# Supplementary material
Source: PubMed Central journal article supplement (PMC3660668)
Supplement: ismej2012175x1.pdf [file ismej2012175x1.pdf]

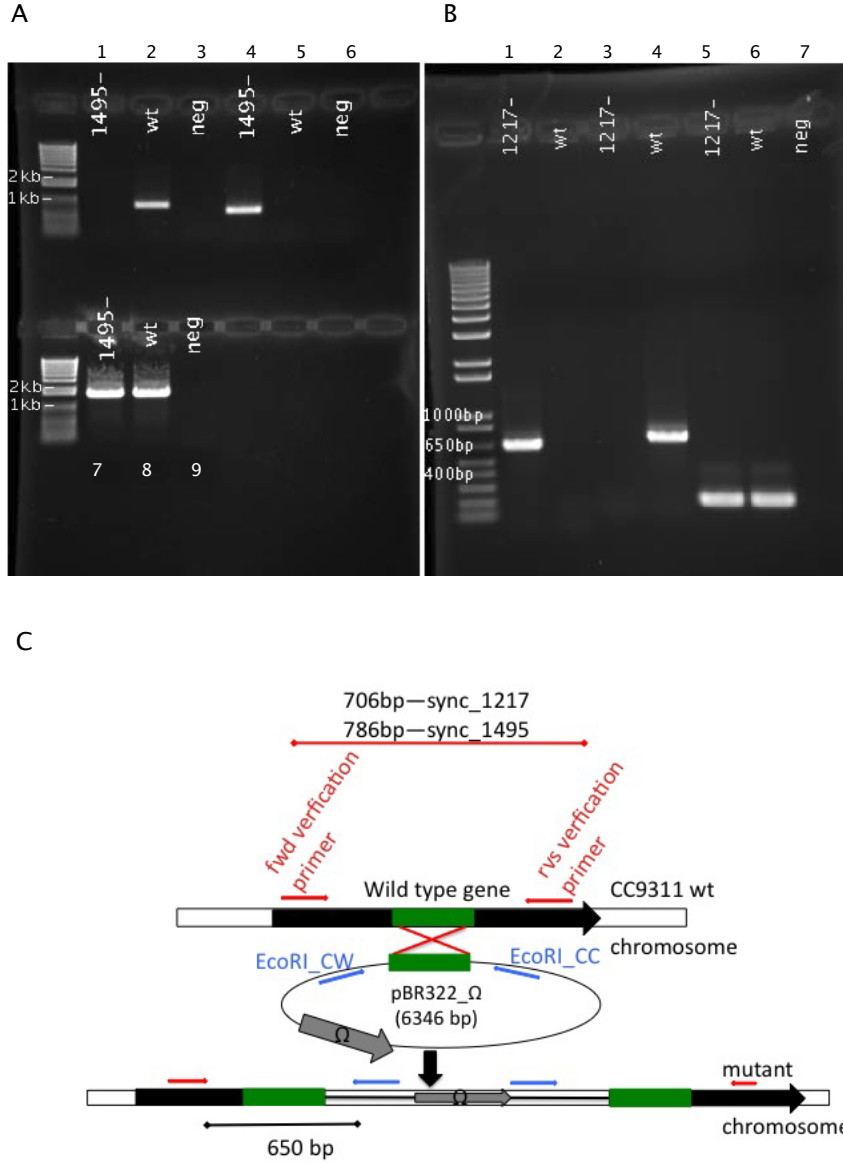

FigS1: PCR verification of sync1495- and sync1217- mutant. “1495-“ or “1217-“ indicates PCR of mutant, “wt” indicates PCR of wild type, “neg” indicates negative control PCR in which no DNA was added. In panel A, lanes 1-3 use primers 1495ckfwd and 1495ckrvs (Table S2) flanking the 399-bp region of recombination such that in wild type a 786-bp product is expected. In the mutant, this 786-bp wild-type fragment is missing. Lanes 4-6 use primers 1495ckfwd and EcoRI CC which is expected to amplify a 650-bp region in the mutant only as the second primer is on the vector. There should be no amplification in the wild-type as it does not contain the integrated plasmid. Lanes 7-9 shows the results of amplification using primers to another genomic gene, sync\_1539 used for a positive control to show that the mutant DNA is amplifiable. In panel B lanes 1-2 use primers 1217ckfwd and EcoRI CW (Table S1), lanes 3-4 use 1217ckfwd and 1217ckrvs and lanes 5-6 use primers to another genomic gene sync1233 used for a positive control to show the mutant DNA is amplifiable. Panel C is a schematic showing annealing locations of primers on both wild type and mutant chromosomes

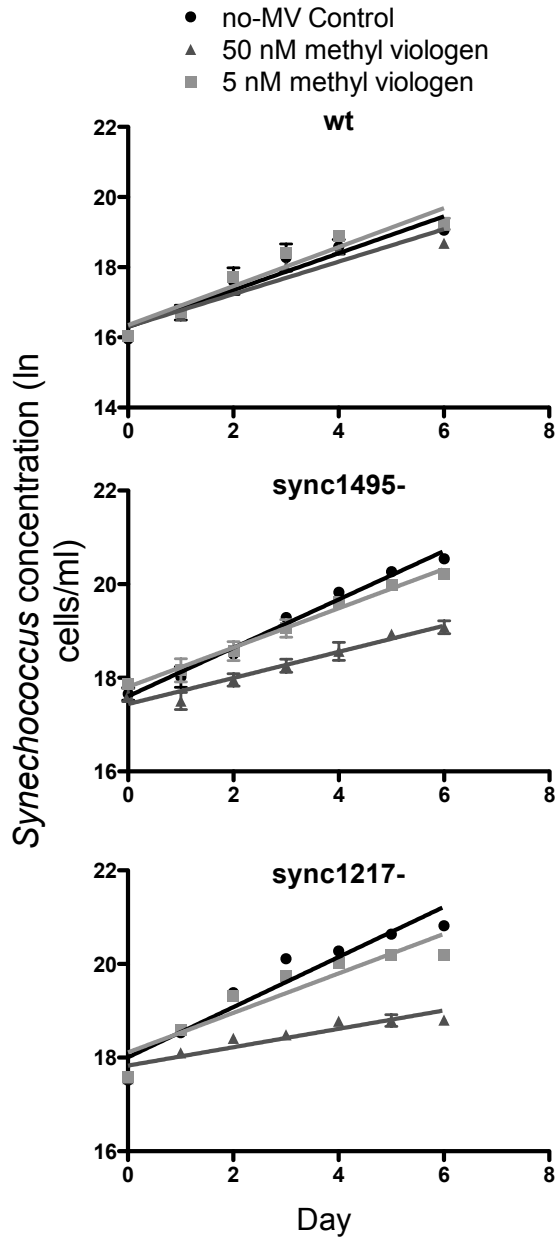

FigS2: *Synechococcus* CC9311 wild-type and mutant methyl viologen growth assays. Growth rates in both wild type CC9311 (“wt”), sync1495- and sync1217-. Cells/ml from flow cytometry were ln-transformed and a linear regression was performed on each. Points represent ln cells/ml and lines represent linear regression. Error bars represent one standard deviation between three biological replicates.

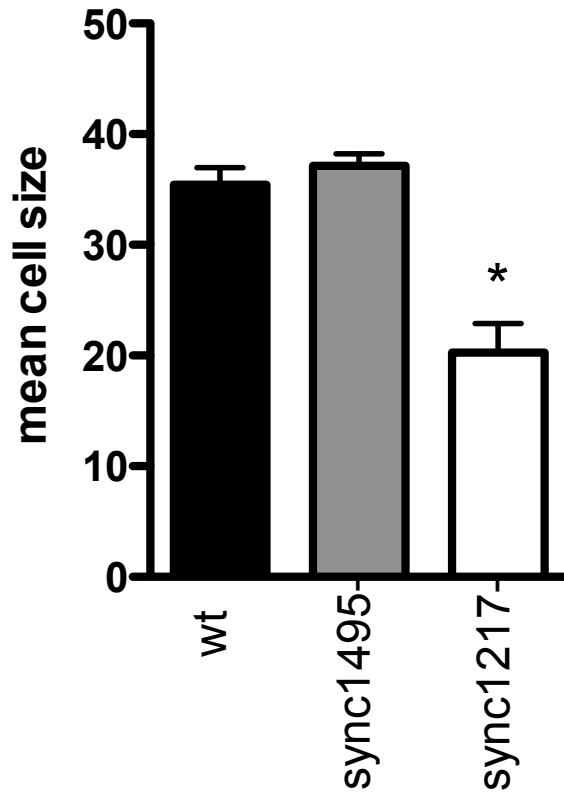

Fig.S3: *Synechococcus* CC9311 wild-type and mutant mean cell size. Measurements determined by side scatter measurements from flow cytometry. All represent mean cell size over 12 days of three biological replicates, all are from no-Cu control treatments from copper growth assay experiments. Error bars represent one standard deviation between three biological replicates. \* indicates significant difference from wild type (one sample t-test,  $p < 0.01$ ).

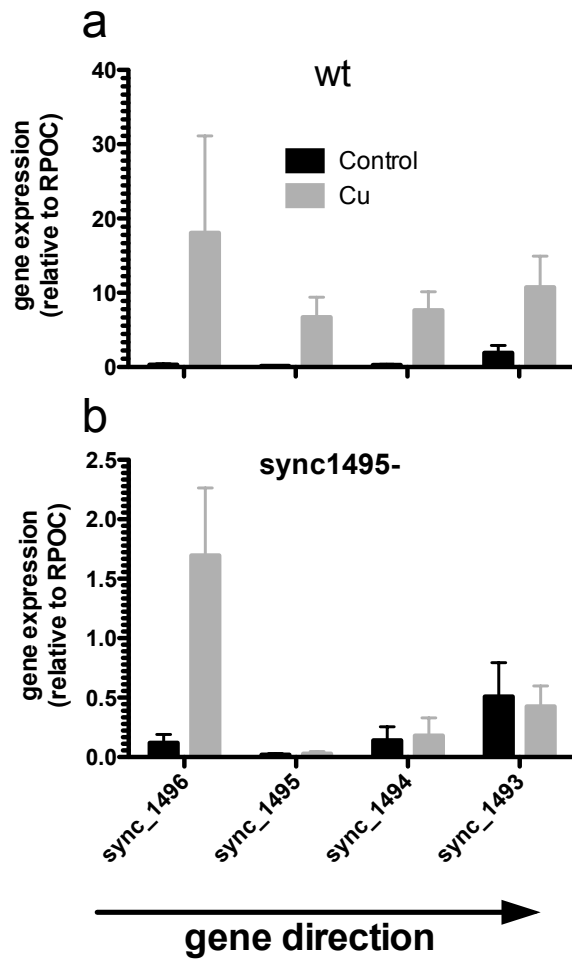

Fig.S4 *Synechococcus* CC9311 wild-type and sync1495- gene expression of putative sync\_1495 operon. (a) shows gene expression wild type CC9311 (“wt”) and (b) shows expression of sync1495- mutant. Copper stress was 2 hours (pCu10.1) and control conditions (no Cu added). Expression is relative to a housekeeping gene (RPOC) and error bars represent one standard deviation between three biological replicates.



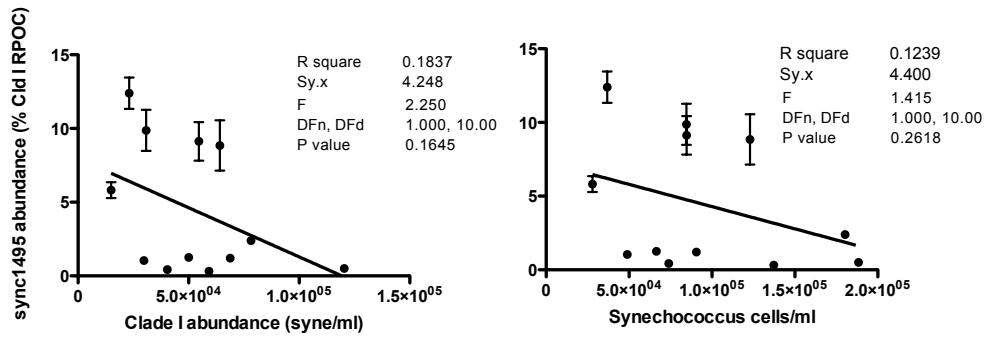

Fig. S6: Correlation test showing no correlation between sync1495 abundance and Clade I or total *Synechococcus* abundance. Error bars represent one standard deviation between three technical QPCR replicates of each sync1495 and RPOC. Clade I abundance numbers and total *Synechococcus* numbers from Tai et al., 2011.

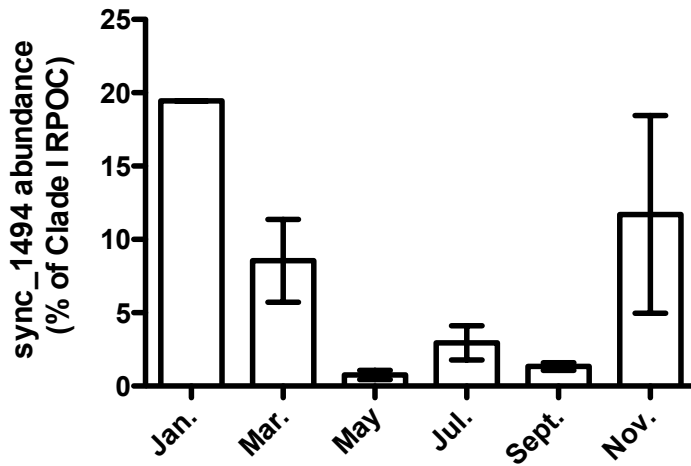

Fig. S7: QPCR showing temporal distribution of sync\_1494 as a percentage of total Clade I *Synechococcus* abundance (as determined by Clade I *rpocI* abundance) in surface samples off the Scripps Institution of Oceanography pier monthly in both 2005 and 2007. Error bars represent +/- one SEM between 2 replicate years (2005 and 2007).

Fig. S8: Additional measurements of water column from depth profile in Fig.5.

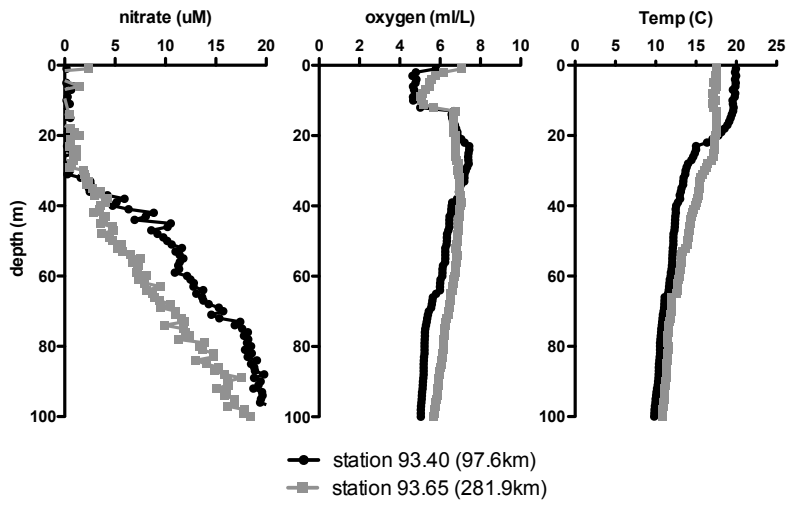

Fig. S8: Additional measurements of water column from depth profile in Fig.5. Nitrate, temperature and oxygen measurements from CTD casts.

Table S1 Primers used in study

| <i>Primer</i> | <i>Primer Sequence (5'-3')</i> | <i>Temp (°C)</i> | <i>Size (bp)</i> | <i>Source</i>    |
|---------------|--------------------------------|------------------|------------------|------------------|
| RPOC362F-I    | TGA AAG GGA TYC CCA GTT ATG T  | 59               | 304              | Tai et al., 2009 |
| RPOC665R-I    | CCC TTA CTI CCA GCA ATC TC     |                  |                  |                  |
| 1495QPCRfwd   | TGG ATT TAC CTT CGC TTT GG     | 59               | 254              | this work        |
| 1495QPCRrvs   | AGA TCC CAC CAA ATG TCA GC     |                  |                  |                  |
| 1496QPCRfwd   | GCCACGTCTCTACAAGGGAA           | 56               | 261              | this work        |
| 1496QPCRrvs   | AGCACCGGTTTCTGGATTGA           |                  |                  |                  |
| 1494QPCRfwd   | TGAAGCCATTAGTCCAGAGGAG         | 56               | 197              | this work        |
| 1494QPCRrvs   | ATCGGGTCAGCAGCAAAAAG           |                  |                  |                  |
| 1493QPCRfwd   | TTGAGAAGCATTCTGCACCG           | 56               | 464              | this work        |
| 1493QPCRrvs   | CAGTTTTGTTGCTGATCCGG           |                  |                  |                  |
| 1495mutfwd    | GGAGGCGGATTGATTGCCAG           | 60               | 399              | this work        |
| 1495mutrvs    | GGCAAGAACAGGGCTTGCGC           |                  |                  |                  |
| 1495ckfwd     | GCCATCAAGAAAACCTCGTTC          | 65               | 786 (wt)         | this work        |
| 1495ckrvs     | AAGAAGACATCGTGAGTGAG           |                  |                  |                  |
| EcoRI CC      | GCTTATCGATGATAAGCTGTCAAA       | 58               | 650 (1495-)      | this work        |
| 1217mutfwd    | TGTTTCTCCTACAAATCTTT           | 54               | 500              | this work        |
| 1217mutrvs    | ATATTGACCCAAAGATGGTT           |                  |                  |                  |
| 1217ckfwd     | TCACTAGTGATATAGGCAAT           | 60               | 706(wt)          | this work        |
| 1217ckrvs     | ATGCTATTGACGTGCTGTAT           |                  |                  |                  |
| EcoRI CW      | ATAGGCGTATCACGAGGCCCT          | 58               | 650 (1217-)      | this work        |

Temp. is the annealing temperature used for amplification. Size is the nucleotide length of the PCR product in base pairs (bp).



Table S2: Hits to sync\_1495 in the CAMERA database

| <b>Location</b>                    | <b>Habitat Type</b> | <b>Depth (m)</b> | <b>Date collected</b> | <b>Top Hit from reciprocal blastn (nr)</b> | <b>E-value</b> | <b>Alignment Length</b> |
|------------------------------------|---------------------|------------------|-----------------------|--------------------------------------------|----------------|-------------------------|
| Western Channel                    | saline water        | 2                | 1/28/08               | Syne. sp. CC9311, sync_1495 region         | 5.00E-71       | 121                     |
| Botany Bay, Australia              | Coastal             | 2                | 9/15/09               | Syne. sp. CC9311, sync_1495 region         | 3.93E-31       | 95                      |
| Station 67-155                     | Open Ocean, DCM     | 84.5             | 10/6/07               | Syne. sp. CC9311, sync_1495 region         | 5.00E-29       | 44                      |
| Station H3                         | Coastal             | 5                | 10/10/07              | Syne. sp. CC9311, sync_1495 region         | 2.00E-27       | 36                      |
| Palm Island, Townsville, Australia | Coastal             | n/a              | 7/29/09               | Syne. sp. CC9311, sync_1495 region         | 6.00E-52       | 44                      |
